# Supplementary material for: High Glucose Treatment Limits Drosha Protein Expression and Alters AngiomiR Maturation in Microvascular Primary Endothelial Cells via an Mdm2-dependent Mechanism
Source: PubMed Central journal article supplement (PMC8065922; doi:10.3390/cells10040742), 2021-03-27
Supplement: cells-10-00742-s001.pdf [file cells-10-00742-s001.pdf]

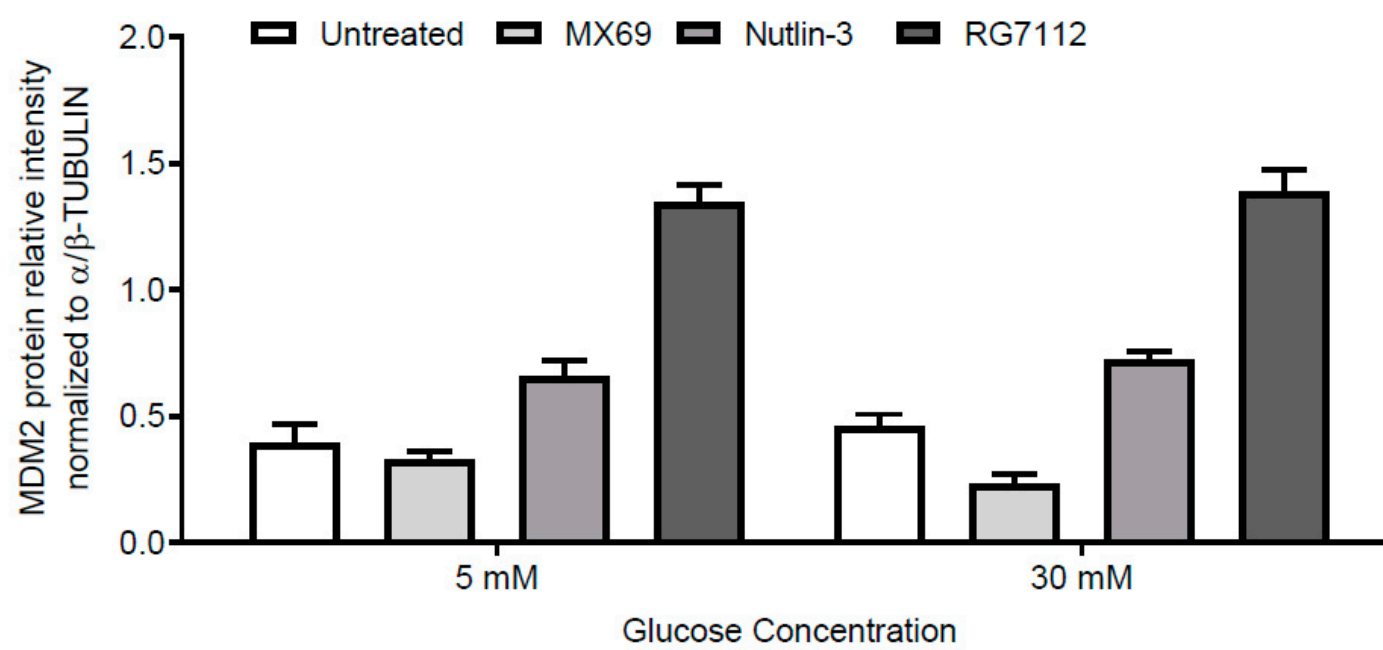

**Supplementary Figure S1.** Human dermal microvascular endothelial cells (HDMECs) were treated with 30 mM or 5 mM glucose and Murine Double Minute-2 (MDM2) inhibitors (MX69, Nutlin-3 and RG7112) for 6 h. Levels of MDM2 protein were measured by western blot.  $\alpha,\beta$ -TUBULIN was used as a loading control. Quantification shows means  $\pm$  SEM,  $n = 6$ . Two-way ANOVA shows an overall effect of MDM2 activity inhibition,  $p < 0.0001$ . Nutlin-3 and RG7112 treated cells presented significant higher level of MDM2 than untreated cells. MX69 treated cells showed a lower level of MDM2 than un-treated cells.

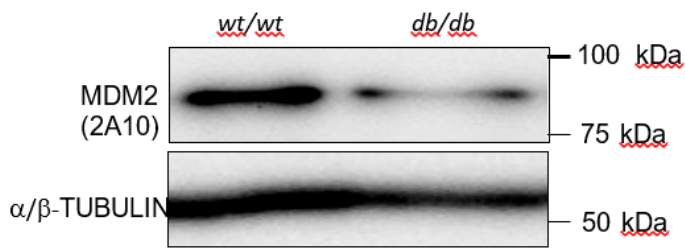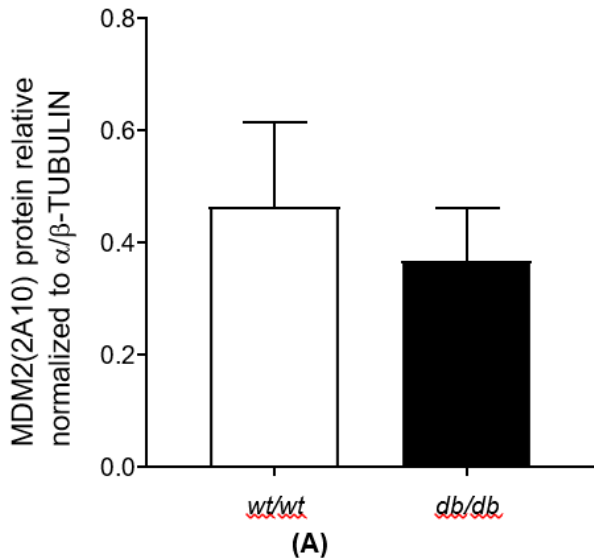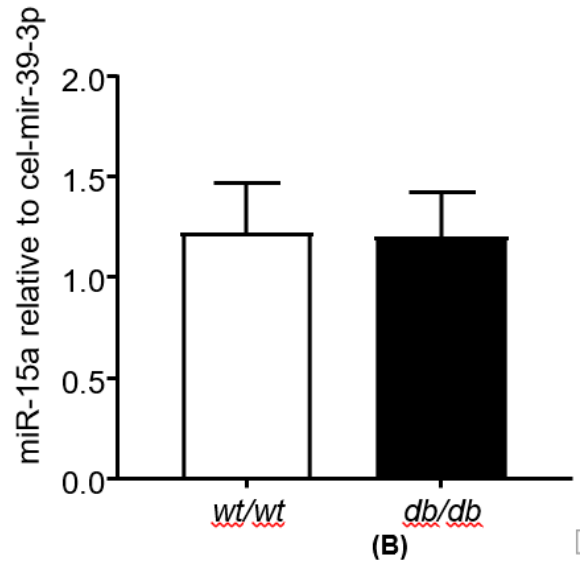

1  
2  
3  
4  
5  
6

**Supplementary Figure S2.** Level of MDM2 protein and miR-15a are similar in the gastrocnemius skeletal muscle of wild type and *db/db* mice aged 13 weeks. **(A)** MDM2 protein levels in *wt/wt* and *db/db* mice as measured by 2A10 antibody.  $\alpha,\beta$ -TUBULIN was used as a loading control. **(B)** Mature miR-15a level relative to exogenous spike-in cel-miR-39-3p. Data are means  $\pm$  SEM (*wt/wt* mice  $n = 8$  and *db/db* mice  $n = 6$ ).
